# Supplementary material for: Longitudinal Improvements in Quality of Life Following Testosterone Replacement Therapy in Men with Biochemical and Symptomatic Testosterone Deficiency: a 12 Month Retrospective Observational Study in a Remote Digital Healthcare Setting in the United Kingdom
Source: Research Square preprint supplement (doi:10.21203/rs.3.rs-6246872/v1), 2025-03-31
Supplement: Supplementary file 1 [file 1e9bb27ebaa78e67c9d9aa93.xlsx]

## Sheet: Sheet1
Supplementary B Table 2: Full ANOVA Results
Factor (Model Term)	Source	Sum Sq	df	F-value	p-value
Treatment Group (C(treatment))	Treatment	619.934	5	2.0096	0.0748194
	Residual	65337.8	1059	–	–
BMI Category (C(bmi_category))	BMI Category	678.894	3	3.6728	0.0119186
	Residual	62785.2	1019	–	–
Weight Category (C(weight_category))	Weight Category	965.11	4	3.93	0.0035816
	Residual	62499	1018	–	–
Height Category (C(height_category))	Height Category	86.8921	3	0.4657	0.706283
	Residual	63377.2	1019	–	–
Alcohol Category (C(alcohol_category))	Alcohol Category	231.992	4	0.9382	0.440968
	Residual	62684.9	1014	–	–
Smoker Status (C(smoker_status))	Smoker Status	933.604	2	7.624	0.0005158
	Residual	65024.2	1062	–	–
This table shows the full ANOVA results for the effect of treatment group and various categorical factors (BMI category, weight category, height category, alcohol category, and smoker status) on qADAM scores.
