# Supplementary material for: Longitudinal Improvements in Quality of Life Following Testosterone Replacement Therapy in Men with Biochemical and Symptomatic Testosterone Deficiency: a 12 Month Retrospective Observational Study in a Remote Digital Healthcare Setting in the United Kingdom
Source: Research Square preprint supplement (doi:10.21203/rs.3.rs-6246872/v1), 2025-03-31
Supplement: Supplementary file 2 [file 33b62a6921bcb2c763a25ec9.xlsx]

## Sheet: Sheet1
Table 1.
Variable (units)	N	Mean (SD)	Median (IQR)	Category (with definition)	n	%
Age (years)	1065	42.9 (8.8)	43 (11)	Young Adult (18–29)	52	4.9
				Early Adulthood (30–39)	327	30.7
				Early Middle Age (40–49)	463	43.5
				Late Middle Age (50–59)	181	17
				Early Older Age (60–69)	38	3.6
				Older/Elderly (≥70)	4	0.4
BMI (kg/m²)	1023	28.7 (4.5)	28.2 (5.2)	Underweight (<18.5)	2	0.2
				Normal (18.5–24.9)	186	17.5
				Overweight (25–29.9)	511	48
				Obese (≥30)	324	30.4
				Missing	42	3.9
Weight (kg)	1023	93.4 (15.7)	90 (18.8)	<70 kg	32	3
				70–79.9 kg	129	12.1
				80–89.9 kg	304	28.5
				90–99.9 kg	258	24.2
				≥100 kg	300	28.2
				Missing	42	3.9
Height (cm)	1023	180.4 (8.3)	180 (10)	<165 cm	6	0.6
				165–174.9 cm	169	15.9
				175–184.9 cm	573	53.8
				≥185 cm	275	25.8
				Missing	42	3.9
Alcohol units/week	1019	6.1 (7.7)	3 (10)	Non-drinker (0 units)	396	37.2
				Low (1–7 units)	274	25.7
				Moderate (8–14 units)	195	18.3
				High (15–21 units)	114	10.7
				Very High (>21 units)	40	3.8
				Missing	46	4.3
Smoker Status				No	914	85.8
				Yes	60	5.6
				Other (Vape; ex)	91	8.5
Treatment Group				Cypionate + HCG	883	82.9
				Testosterone Enanthate	68	6.4
				Cypionate	62	5.8
				Sustanon	36	3.4
				Testosterone Cream	10	0.9
				Testogel	6	0.6
qADAM Baseline (score/50)	1065	29.69 (7.29)
Total Testosterone Baseline (nmol/L)	855	13.63 (24.25)
Free Testosterone Baseline (nmol/L)	893	0.66 (10.42)
SHBG Baseline (nmol/L)	896	27.27 (12.93)
Summarises key demographic and clinical information for the 1,065 men included in the study. Most participants were in early middle age and notably overweight/obese. Baseline hormone measurements were missing for some individuals, reflecting real-world data limitations.
