# Supplementary material for: Longitudinal Improvements in Quality of Life Following Testosterone Replacement Therapy in Men with Biochemical and Symptomatic Testosterone Deficiency: a 12 Month Retrospective Observational Study in a Remote Digital Healthcare Setting in the United Kingdom
Source: Research Square preprint supplement (doi:10.21203/rs.3.rs-6246872/v1), 2025-03-31
Supplement: Supplementary file 3 [file 4120a9182947089f776968e2.xlsx]

## Sheet: Sheet1
Table 2.
Measure	N	Baseline Mean (SD)	Follow-up Mean (SD)	Mean Diff (95% CI)	p-value*	Cohen d
qADAM (total score /50)	1065	29.69 (7.29)	36.32 (6.32)	6.64 [6.16, 7.11]	<0.0001	-0.84
Domains (each scored out of 1-5)
Q1 Libido	1065	2.40 (1.16)	3.44 (1.07)	1.04 [0.96, 1.12]	<0.0001	-0.8
Q2 Energy Level	1065	2.44 (1.04)	3.38 (0.91)	0.94 [0.87, 1.01]	<0.0001	-0.8
Q3 Strength Endurance	1065	2.89 (1.04)	3.66 (0.85)	0.77 [0.71, 0.84]	<0.0001	-0.71
Q4 Life Enjoyment	1065	2.84 (0.97)	3.57 (0.86)	0.73 [0.67, 0.79]	<0.0001	-0.71
Q5 Happiness	1065	2.86 (0.95)	3.52 (0.84)	0.65 [0.59, 0.71]	<0.0001	-0.65
Q6 Erection Strength	1065	2.71 (1.05)	3.40 (0.99)	0.69 [0.62, 0.75]	<0.0001	-0.62
Q7 Work Performance	1065	2.83 (1.05)	3.54 (0.90)	0.71 [0.64, 0.79]	<0.0001	-0.61
Q8 Falling Asleep	1018	3.56 (1.29)	4.06 (1.21)	0.50 [0.41, 0.59]	<0.0001	-0.33
Q9 Sports Ability	1065	2.67 (1.11)	3.47 (0.95)	0.80 [0.73, 0.87]	<0.0001	-0.66
Q10 Height Lost	1047	4.51 (0.94)	4.61 (0.92)	0.11 [0.04, 0.17]	0.002	-0.1
Presents the main outcome (qADAM total score) and each subdomain at baseline and 12 months. All domains improved significantly, with a mean total qADAM increase of 6.64 points, indicating robust, multidomain symptomatic relief.
