# Supplementary material for: Longitudinal Improvements in Quality of Life Following Testosterone Replacement Therapy in Men with Biochemical and Symptomatic Testosterone Deficiency: a 12 Month Retrospective Observational Study in a Remote Digital Healthcare Setting in the United Kingdom
Source: Research Square preprint supplement (doi:10.21203/rs.3.rs-6246872/v1), 2025-03-31
Supplement: Supplementary file 4 [file 691d66faef903138587106c9.xlsx]

## Sheet: Sheet1
Table 3.
Measure (Diff)	N(Diff)	Baseline Mean (SD)	Follow-up Mean (SD)	Mean Diff (95% CI)	p-value(Diff)	Cohen’s d
Total Testosterone (nmol/L)	853	13.62 (24.27)	44.87 (51.11)	31.25 [27.49, 35.01]	<0.0001	0.56
SHBG (nmol/L)	894	27.25 (12.93)	29.88 (12.12)	2.63 [2.11, 3.15]	<0.0001	0.33
Free Testosterone (nmol/L)	891	0.66 (10.43)	1.19 (1.38)	0.53 [-0.16, 1.22]	0.1342	0.05
Measure (Corr)	N(Corr)	Hormone Mean (SD)	QADAM Mean (SD)	Pearson r	p-value(Corr)
Total Testosterone (nmol/L)	853	31.25 (55.92)	6.85 (7.90)	0.099	0.0038
SHBG (nmol/L)	894	2.63 (7.94)	6.62 (7.97)	-0.014	0.6759
Free Testosterone (nmol/L)	891	0.53 (10.52)	6.61 (7.98)	0.002	0.9453
Reports the rise in total testosterone (+31.25 nmol/L) and correlations (Pearson’s r) between hormonal changes and qADAM improvements. Although testosterone levels increased, the relationship with symptom relief was modest.
