# Supplementary material for: Longitudinal Improvements in Quality of Life Following Testosterone Replacement Therapy in Men with Biochemical and Symptomatic Testosterone Deficiency: a 12 Month Retrospective Observational Study in a Remote Digital Healthcare Setting in the United Kingdom
Source: Research Square preprint supplement (doi:10.21203/rs.3.rs-6246872/v1), 2025-03-31
Supplement: Supplementary file 5 [file 6aca6c6ad47bc1337f764c86.xlsx]

## Sheet: Sheet1
Supplementary File B Table 1 - Subgroup analyses
Factor & Categories	Baseline qADAM Mean (SD)	Follow-up qADAM Mean (SD)	Mean Diff (95% CI)	p-value	Cohen’s d
Overall Treatment Effect (ANOVA)	–	–	–	0.075	–
By BMI Category (ANOVA)				0.0119
Normal (n=186)	30.7 (7.2)	37.0 (6.2)	6.35 [5.28, 7.43]	<0.0001	0.86
Overweight (n=511)	30.3 (7.3)	36.6 (6.1)	6.28 [5.58, 6.97]	<0.0001	0.79
Obese (n=324)	27.6 (6.8)	35.6 (6.6)	8.03 [7.17, 8.89]	<0.0001	1.02
Post-hoc (Tukey) BMI
Obese vs. Overweight	–	–	-1.75 [-3.19, -0.32]	0.0093	–
By Smoker Status (ANOVA p=0.0005)
No (n=914)	29.7 (7.3)	36.7 (6.2)	6.94 [6.43,7.44]	<0.0001	0.89
Yes (n=60)	27.7 (7.1)	34.4 (6.1)	6.68 [4.53,8.82]	<0.0001	0.81
Other (n=91)	30.5 (7.6)	34.1 (6.7)	3.58 [1.92,5.23]	<0.0001	0.45
Post-hoc (Tukey) Smoker
No vs Other	–	–	-3.36 [-5.38, -1.34]	<0.0001	–
Other vs Yes	–	–	3.10 [0.04, 6.15]	0.0461	–
By Weight Category (ANOVA p=0.0036)
80-89.9 kg (n=304)	30.5 (7.3)	36.7 (6.0)	6.18 [5.28,7.08]	<0.0001	0.78
≥100 kg (n=300)	27.5 (6.8)	35.7 (6.3)	8.22 [7.35,9.08]	<0.0001	1.08
Post-hoc (Tukey) Weight
≥100 kg vs 80-89.9 kg	–	–	2.04 [0.29,3.78]	0.0127	–
≥100 kg vs 90-99.9 kg	–	–	2.10 [0.28,3.92]	0.0141	–
Subgroup Analyses by BMI and Smoking Status. Mean qADAM changes by BMI category and smoker status, including post-hoc Tukey comparisons. Underweight class had n = 2 and was removed due to low n number.
