# Supplementary material for: Longitudinal Improvements in Quality of Life Following Testosterone Replacement Therapy in Men with Biochemical and Symptomatic Testosterone Deficiency: a 12 Month Retrospective Observational Study in a Remote Digital Healthcare Setting in the United Kingdom
Source: Research Square preprint supplement (doi:10.21203/rs.3.rs-6246872/v1), 2025-03-31
Supplement: Supplementary file 6 [file 9e744590d2f3dfacf28ffc64.xlsx]

## Sheet: Sheet1
Supplementary File B Table 4: Full Paired T-Test results by category
A) By Treatment Group
Treatment Group	N	Baseline Mean (SD)	Follow-up Mean (SD)	Mean Diff (95% CI)	p-value
Cypionate + HCG	883	29.72 (7.30)	36.34 (6.41)	6.62 [6.10, 7.15]	9.23e-103
Testosterone Enanthate	68	28.69 (6.74)	36.70 (5.54)	8.01 [6.31, 9.71]	7.55e-14
Cypionate	62	32.01 (7.97)	36.64 (6.02)	4.63 [2.86, 6.40]	2.14e-06
Testosterone Cream	10	27.80 (7.45)	32.15 (5.94)	4.35 [-1.16, 9.86]	0.1075
Sustanon	36	27.03 (6.06)	35.82 (6.40)	8.79 [6.10, 11.48]	1.14e-07
Testogel	6	31.67 (6.28)	36.33 (4.55)	4.67 [-3.75, 13.08]	0.2132
B) By BMI Category
BMI Category	N	Baseline Mean (SD)	Follow-up Mean (SD)	Mean Diff (95% CI)	p-value
Overweight	511	30.30 (7.34)	36.58 (6.12)	6.28 [5.58, 6.97]	2.77e-55
Obese	324	27.60 (6.78)	35.63 (6.59)	8.03 [7.17, 8.89]	5.24e-52
Normal	186	30.65 (7.23)	37.00 (6.24)	6.35 [5.28, 7.43]	5.07e-24
Underweight	2	26.00 (1.41)	35.50 (2.12)	9.50 [3.15, 15.85]	0.0335
C) By Weight Category
Weight Category	N	Baseline Mean (SD)	Follow-up Mean (SD)	Mean Diff (95% CI)	p-value
80-89.9 kg	304	30.51 (7.32)	36.69 (5.99)	6.18 [5.28, 7.08]	5.9e-33
90-99.9 kg	258	30.07 (7.08)	36.19 (6.57)	6.11 [5.17, 7.06]	2.23e-29
≥100 kg	300	27.50 (6.77)	35.72 (6.34)	8.22 [7.35, 9.08]	4.69e-52
70-79.9 kg	129	30.40 (7.85)	37.62 (5.90)	7.22 [5.79, 8.65]	1.02e-17
<70 kg	32	30.34 (6.49)	35.32 (7.55)	4.97 [1.97, 7.98]	0.00198
D) By Height Category
Height Category	N	Baseline Mean (SD)	Follow-up Mean (SD)	Mean Diff (95% CI)	p-value
165-174.9 cm	169	30.05 (7.76)	36.75 (6.21)	6.70 [5.36, 8.04]	2.32e-18
175-184.9 cm	573	29.47 (7.20)	36.17 (6.50)	6.69 [6.07, 7.31]	7.3e-74
≥185 cm	275	29.25 (7.04)	36.48 (5.88)	7.24 [6.30, 8.17]	1.58e-38
<165 cm	6	28.17 (7.36)	37.17 (9.62)	9.00 [-2.15, 20.15]	0.09257
E) By Alcohol Category
Alcohol Category	N	Baseline Mean (SD)	Follow-up Mean (SD)	Mean Diff (95% CI)	p-value
Low	274	29.90 (7.36)	36.25 (6.80)	6.34 [5.39, 7.30]	1.12e-30
Non-drinker	396	29.52 (7.73)	36.49 (6.19)	6.97 [6.17, 7.78]	6.17e-49
Very High	40	29.13 (6.43)	35.41 (6.89)	6.29 [3.83, 8.74]	7.01e-06
Moderate	195	28.68 (6.49)	36.39 (6.01)	7.70 [6.68, 8.72]	5.64e-34
High	114	29.68 (6.52)	36.38 (5.84)	6.70 [5.32, 8.08]	2.7e-16
F) By Smoker Status
Smoker Status	N	Baseline Mean (SD)	Follow-up Mean (SD)	Mean Diff (95% CI)	p-value
No	914	29.74 (7.26)	36.67 (6.24)	6.94 [6.43, 7.44]	3.66e-118
Yes	60	27.72 (7.07)	34.39 (6.09)	6.68 [4.53, 8.82]	5.14e-08
Other	91	30.52 (7.60)	34.10 (6.67)	3.58 [1.92, 5.23]	4.36e-05
All paired t-test results comparing baseline and follow-up qADAM scores for each treatment group and category (BMI, Weight, Height, Alcohol, Smoker). Mean difference is presented as Follow-up - Baseline.
