# Supplementary material for: Longitudinal Improvements in Quality of Life Following Testosterone Replacement Therapy in Men with Biochemical and Symptomatic Testosterone Deficiency: a 12 Month Retrospective Observational Study in a Remote Digital Healthcare Setting in the United Kingdom
Source: Research Square preprint supplement (doi:10.21203/rs.3.rs-6246872/v1), 2025-03-31
Supplement: Supplementary file 7 [file a7303ae2f1ee1e096a4c38ff.xlsx]

## Sheet: Sheet1
Supplementary File A Table 1 - Sensitivity analyses
Variable	Correlation Coefficient (p-value)
Overall QADAM Score
Total T change vs. qADAM change	0.129 (p<0.001)
Free T change vs. qADAM change	0.137 (p<0.001)
SHBG change vs. qADAM change	0.073 (p=0.030)
qADAM sub-domain scores
Total T change vs. change in:
Libido	0.103 (p=0.002)
Energy	0.143 (p<0.001)
Strength	0.081 (p=0.010)
Life enjoyment	0.095 (p=0.003)
Happiness	0.091 (p=0.007)
Erection	0.088 (p=0.009)
Work	0.092 (p=0.005)
Asleep	0.080 (p=0.015)
Sports	0.098 (p=0.002)
Height loss	0.006 (p=0.735)
Free T change vs. change in:
Libido	0.120 (p<0.001)
Energy	0.153 (p<0.001)
Strength	0.097 (p=0.002)
Life enjoyment	0.103 (p=0.001)
Happiness	0.083 (p=0.011)
Erection	0.089 (p=0.007)
Work	0.112 (p<0.001)
Asleep	0.060 (p=0.066)
Sports	0.011 (p<0.001)
Height loss	0.014 (p=0.603)
SHBG change vs. change in:
Libido	0.017 (p=0.575)
Energy	0.066 (p=0.046)
Strength	0.029 (p=0.376)
Life enjoyment	0.080 (p=0.016)
Happiness	0.089 (p=0.009)
Erection	0.082 (p=0.013)
Work	0.070 (p=0.032)
Asleep	0.041 (p=0.232)
Sports	0.048 (p=0.133)
Height loss	0.020 (p=0.556)
