# Supplementary material for: Longitudinal Improvements in Quality of Life Following Testosterone Replacement Therapy in Men with Biochemical and Symptomatic Testosterone Deficiency: a 12 Month Retrospective Observational Study in a Remote Digital Healthcare Setting in the United Kingdom
Source: Research Square preprint supplement (doi:10.21203/rs.3.rs-6246872/v1), 2025-03-31
Supplement: Supplementary file 8 [file d288c701b9e247802c6c5790.xlsx]

## Sheet: Sheet1
Supplementary File B Table 3 - Full Tukey HSD post-hoc results
Comparison	Mean Diff	p-adj	95% CI Lower	95% CI Upper	Reject
Normal - Obese	1.6765	0.0938	-0.1816	3.5347	FALSE
Normal - Overweight	-0.0766	0.9995	-1.8064	1.6531	FALSE
Normal - Underweight	3.1452	0.9428	-11.2142	17.5045	FALSE
Obese - Overweight	-1.7532	0.0093	-3.1876	-0.3187	TRUE
Obese - Underweight	1.4686	0.9936	-12.8582	15.7954	FALSE
Overweight - Underweight	3.2218	0.9383	-11.0889	17.5325	FALSE
B) Weight Category Comparisons
Comparison	Mean Diff	p-adj	95% CI Lower	95% CI Upper	Reject
70-79.9kg - 80-89.9kg	-1.0367	0.7164	-3.2866	1.2132	FALSE
70-79.9kg - 90-99.9kg	-1.1021	0.6886	-3.4109	1.2068	FALSE
70-79.9kg - <70kg	-2.2431	0.5956	-6.4717	1.9855	FALSE
70-79.9kg - ≥100kg	0.9985	0.7454	-1.2559	3.2529	FALSE
80-89.9kg - 90-99.9kg	-0.0654	1	-1.8779	1.7471	FALSE
80-89.9kg - <70kg	-1.2064	0.9218	-5.1857	2.7729	FALSE
80-89.9kg - ≥100kg	2.0352	0.0127	0.2927	3.7777	TRUE
90-99.9kg - <70kg	-1.141	0.9372	-5.154	2.8719	FALSE
90-99.9kg - ≥100kg	2.1006	0.0141	0.2826	3.9186	TRUE
<70kg - ≥100kg	3.2416	0.1714	-0.7402	7.2234	FALSE
C) Smoker Status Comparisons
Comparison	Mean Diff	p-adj	95% CI Lower	95% CI Upper	Reject
No - Other	-3.3585	0.0003	-5.3772	-1.3398	TRUE
No - Yes	-0.2623	0.9657	-2.7097	2.1852	FALSE
Other - Yes	3.0962	0.0461	0.0422	6.1503	TRUE
All Tukey HSD pairwise comparisons for significant factors (BMI category, Weight category, and Smoker status). “reject” indicates whether the null hypothesis of no difference between groups is rejected at the given significance level of p<0.05.
